# Supplementary material
Source: HighWire-hosted journal article supplement (https://jnm.snmjournals.org/highwire/filestream/99048/field_highwire_adjunct_files/0/237198_Supplemental_Data.pdf)
Supplement: 237198_Supplemental_Data.pdf [file 237198_Supplemental_Data.pdf]

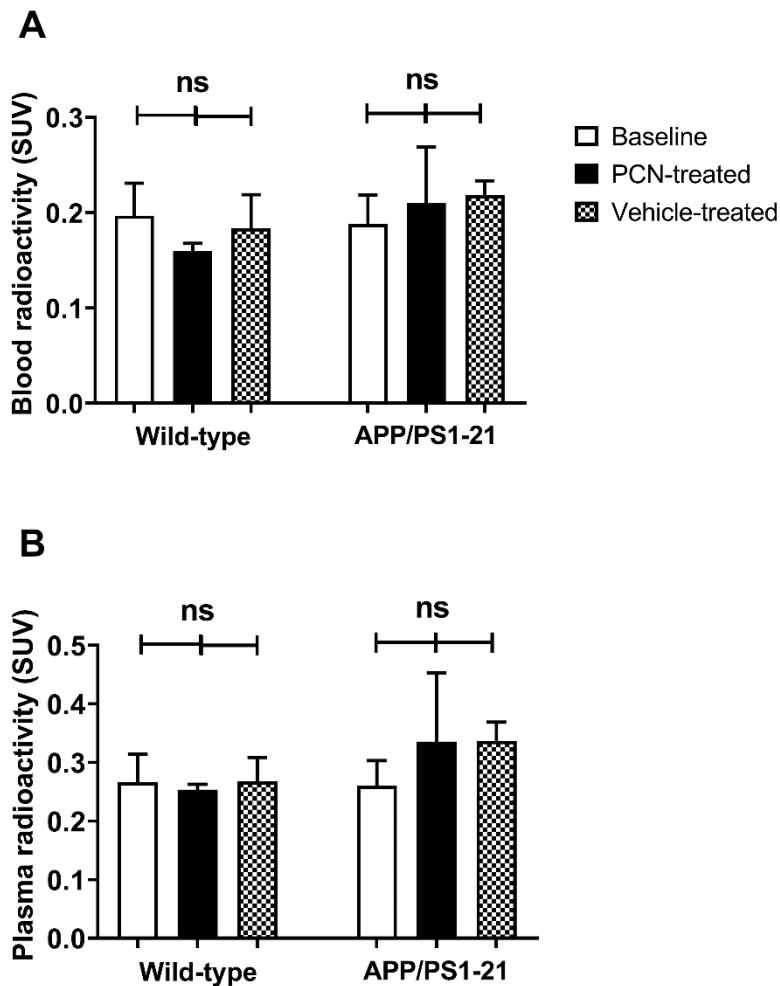

**SUPPLEMENTAL FIGURE 1.** Total radioactivity (mean $\pm$ SD) in venous blood (A) and venous plasma (B) of samples collected at the end of the PET scan for wild-type and APP/PS1-21 mice aged 170 days at baseline and after treatment with PCN or vehicle. ns, not significant, one-way ANOVA followed by Tukey's multiple comparison test

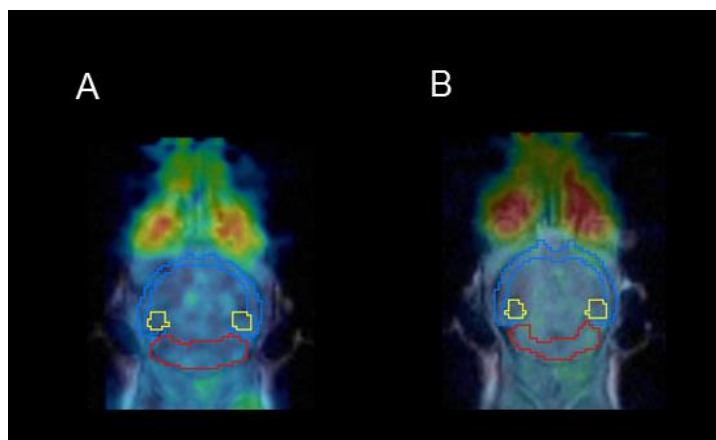

**SUPPLEMENTAL FIGURE 2.** Representative coronal MR co-registered PET summation images (0-90 min) in one wild-type mouse (A) aged 170 days and one APP/PS1-21 mouse (B) aged 170 days. The outlined regions of interest are shown: cortex (blue), hippocampus (yellow) and cerebellum (red). The cerebellum served as a control region without A $\beta$  deposits (but with ABCB1 expression).

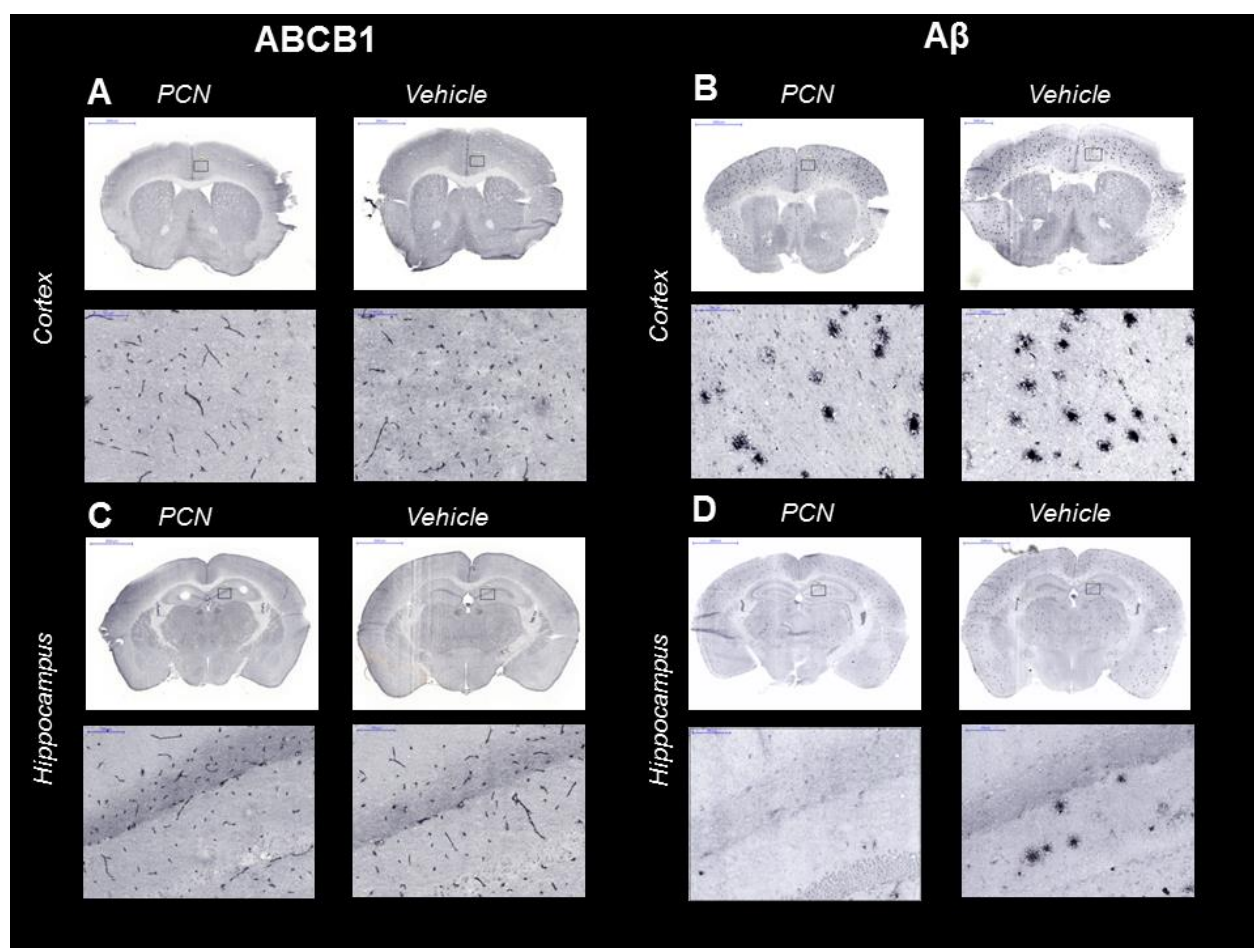

**SUPPLEMENTAL FIGURE 3.** Immunohistochemical staining of ABCB1 in brain microvessels (A, C) and Aβ (B, D) in the cortex and hippocampus of APP/PS1-21 mice aged 170 days treated with PCN or vehicle (scale bar=2000 μm). An enlarged section of the area is shown at a 20x magnification below each image (scale bar=100 μm).

# SUPPLEMENTAL TABLE 1.

Metabolism of  $^{11}\text{C}$ -Metoclopramide\*

Wild-type<sup>†</sup> APP/PS1-21<sup>†</sup> PCN-treated<sup>††</sup>

| <i>n</i> | 3    | 4                 | 3                 |
|----------|------|-------------------|-------------------|
| Plasma   | 39±8 | 24±2 <sup>§</sup> | 24±4 <sup>§</sup> |
| Brain    | 92±4 | 82±7              | 86±7              |
| Liver    | 78±3 | 61±3 <sup>§</sup> | 64±6 <sup>§</sup> |
| Kidney   | 66±4 | 63±5              | 58±3              |
| Bile     | 56±9 | 33±10             | 45±21             |
| Urine    | 53±8 | 40±12             | 39±20             |

\*Stated is the mean±SD percentage of unchanged  $^{11}\text{C}$ -metoclopramide in different tissues and fluids determined with radio-thin-layer chromatography at 15 min after injection of  $^{11}\text{C}$ -metoclopramide

<sup>†</sup>Animals were i.p. pretreated for 7 days once daily with PCN vehicle (5% dimethyl sulfoxide in safflower oil)

<sup>††</sup>Animals (wild-type: *n*=1, APP/PS1-21: *n*=2) were i.p. pretreated for 7 days once daily with PCN (25 mg/kg)

<sup>§</sup>*P*<0.05, for comparison with wild-type, one-way ANOVA followed by a Tukey's multiple comparison test

## SUPPLEMENTAL TABLE 2

$k_{E,brain}$  Values in All Examined Animal Groups

| Group                     | Region      | $k_{E,brain}$ (1/h) |
|---------------------------|-------------|---------------------|
| Wild-type baseline        | Hippocampus | 0.650±0.074         |
|                           | Cortex      | 0.665±0.063         |
|                           | Cerebellum  | 0.775±0.093         |
| Wild-type PCN             | Hippocampus | 1.003±0.157         |
|                           | Cortex      | 0.958±0.155         |
|                           | Cerebellum  | 1.059±0.145         |
| Wild-type vehicle         | Hippocampus | 0.722±0.055         |
|                           | Cortex      | 0.758±0.059         |
|                           | Cerebellum  | 0.934±0.152         |
| APP/PS1-21 baseline       | Hippocampus | 0.704±0.094         |
|                           | Cortex      | 0.660±0.070         |
|                           | Cerebellum  | 0.812±0.109         |
| APP/PS1-21 PCN            | Hippocampus | 0.938±0.083         |
|                           | Cortex      | 0.918±0.089         |
|                           | Cerebellum  | 1.023±0.073         |
| APP/PS1-21 vehicle        | Hippocampus | 0.733±0.100         |
|                           | Cortex      | 0.711±0.093         |
|                           | Cerebellum  | 0.841±0.115         |
| Wild-type baseline (50d)  | Hippocampus | 0.882±0.065         |
|                           | Cortex      | 0.743±0.044         |
|                           | Cerebellum  | 0.893±0.027         |
| APP/PS1-21 baseline (50d) | Hippocampus | 0.817±0.108         |
|                           | Cortex      | 0.739±0.088         |
|                           | Cerebellum  | 0.830±0.097         |

Values are reported as mean±standard deviation.

$k_{E,brain}$  (1/h), elimination slope for radioactivity washout from the brain
